# Supplementary figures and images for: Eculizumab versus rituximab in generalised myasthenia gravis
Source: PubMed Central journal article supplement — J Neurol Neurosurg Psychiatry. 2022 Mar 4;93(5):548–54. doi: 10.1136/jnnp-2021-328665 (PMC9016243; doi:10.1136/jnnp-2021-328665), 2022-03-04

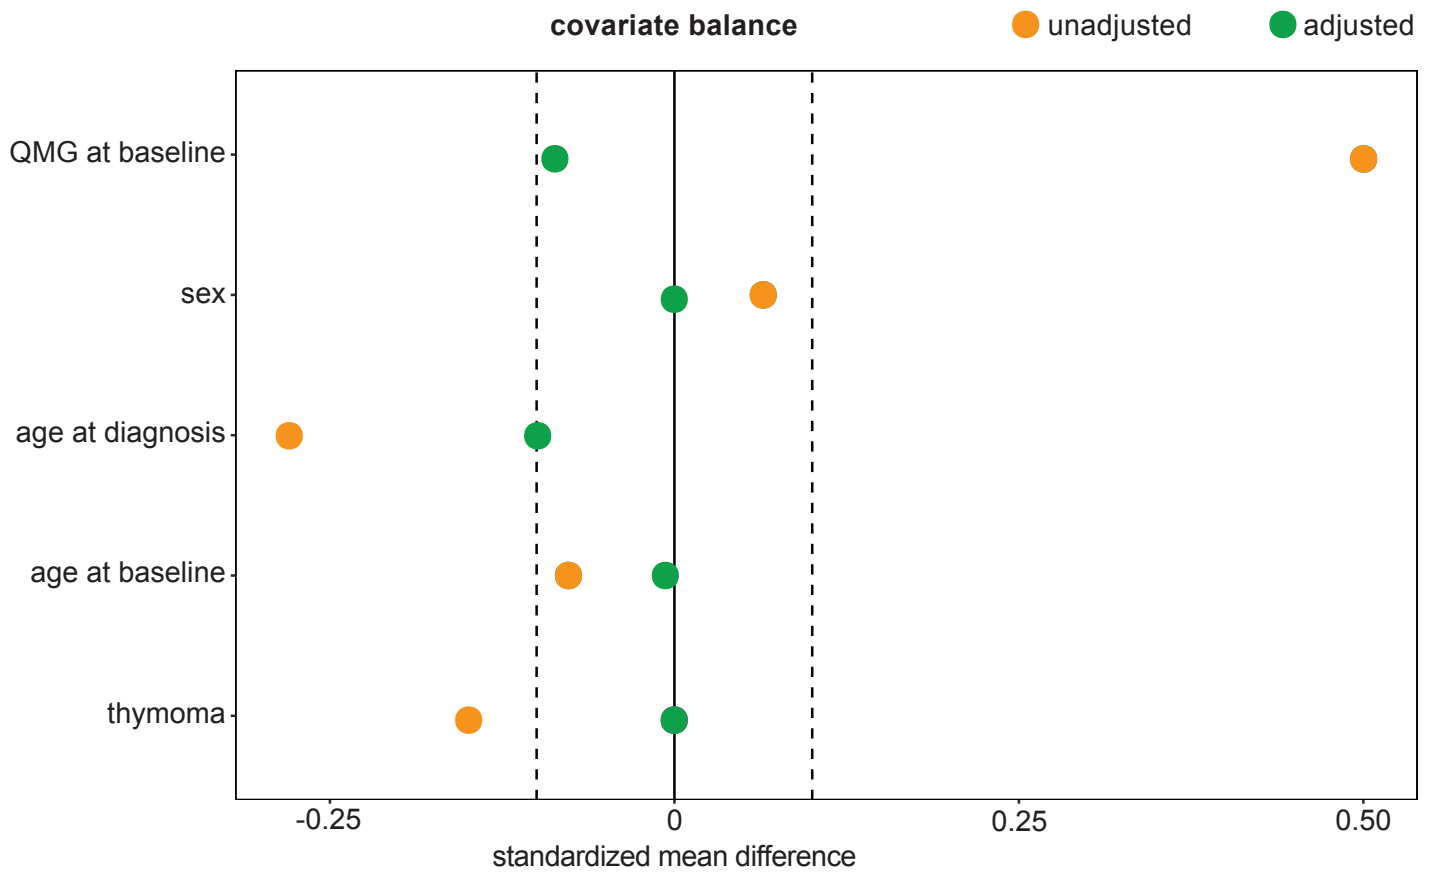

Supplement: jnnp-2021-328665supp001.pdf [file jnnp-2021-328665supp001.pdf]
